# Supplementary material
Source: Springer Nature journal article supplement (https://www.springermedizin.de/resource/supplementary/12950_2011_222_MOESM4_ESM.pdf/9558230)

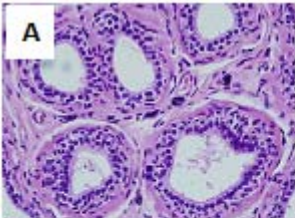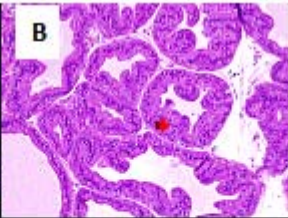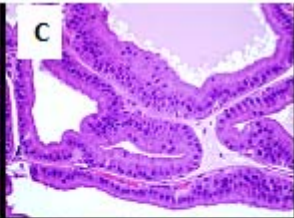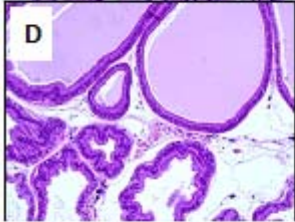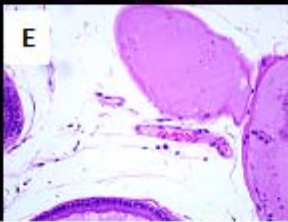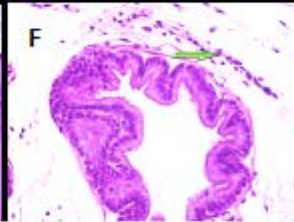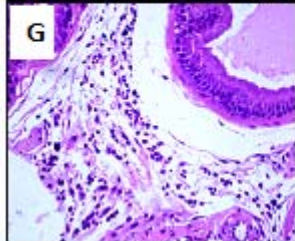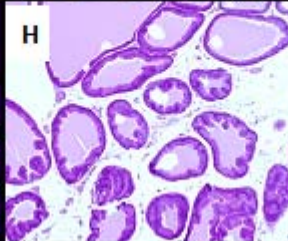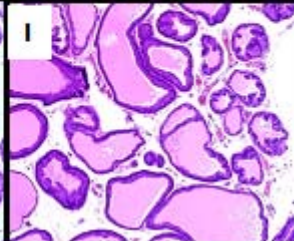

Supplement: MOESM4 [file 9558230]
